# Supplementary material
Source: PubMed Central journal article supplement (PMC8709884)
Supplement: NIHMS1709867-supplement-sm2.pdf [file NIHMS1709867-supplement-sm2.pdf]

Dr Cristina Ghiani  
Editor-in-Chief, Journal of Neuroscience Research

Associate Editor: Prager, Eric  
Comments to the Author:

This study develops a new rabbit model mimicking the partial-to-total placental insufficiency and compared it with previous models of total uterine ischemia. The introduction has a very important statement describing the development of a model of CP after HI at preterm gestation but note that they were not sure it mimicked the actual clinical course, specifically as it relates to an immediate and complete cessation of blood supply to the uterus. Therefore, developing a new model that is more translational, in that there is a gradual increase in ischemia is needed. Critically, they note that the new model was compared to the entire dataset of experiments done since 2004/2005 when the model was first characterized. While the potential to publish this paper is there, there are a lot of critical errors throughout the manuscript that must be addressed prior to review. My comments are below and did not include the additional comments from the EIC:

- 1) In general, what are the randomization and blinding procedures?
- 2) What is the rationale for developing a partial abruption vs. total? This is necessary in the abstract, which should also be reduced in size and only the most critical information presented
- 3) Why in rabbits? Is this a normal model?
- 4) While Kendall et al., 2019 provide important information about the 3Rs and reducing animal numbers, I am concerned about the conditions in which the study took place. Were the housing/husbandry conditions the same, how did they combine datasets from previous studies? What were the procedures for that and what were the inclusion/exclusion criteria? What studies specifically did they use data from?
- 5) What were the housing/husbandry procedures for the current animals used in this study?
- 6) How many litters, from how many females? What were the breeding procedures?
- 7) The experimental groups appear to have only consisted of Full H-I and Partial+Full H-I. Why is there not a partial H-I only group and a naïve control group? These should be included. Also, why did they choose a partial+full H-I? Where is the rationale for this? How did they determine the timeframe for balloon inflation?
- 8) If you used Full-HI from previous studies, then this study only used the partial-full. This is a critical error since you do not have a new control to compare. While it is fine to use previous datasets, you also need to collect a new set of data to ensure that the outcomes will be the same as previously found.
- 9) The authors note that with the partial H-I, there was low BP to "about half of that before inflation". Do the authors have data to demonstrate that it was half and how consistent were they? Were any animals from this group excluded?
- 10) How many animals did you start with and how did you determine the sample size? How many died and how did that change the power?
- 11) What were the "minor revisions" for the neurobehavioral assessments
- 12) Don't use the word gender, use sex, but how many of each sex were used?
- 13) How did authors determine the brain regions to assess?
- 14) Student's T-tests are likely incorrect since the sample sizes are so different. This will be a violation of the assumption of normality. I recommend that all data are assessed by a biostatistician, especially to compare the differences in power. Along those lines, the authors need to assess for differences between the groups of data collected from different studies.
- 15) Correlational analyses were not described in the statistical approaches section
- 16) Fig 1 appears as a longitudinal design, when it in fact is not. This figure needs to be redone. Again discuss with a biostatistician, but given that this is a 3x2 between subject design, the figures and data will need to be revised accordingly.
- 17) Fig 2 doesn't have error bars. Also, do not use bar graphs. Please also check the organization of the graphs. They do not appear to align with the figure legends.

Overall, I cannot allow this paper to go for review yet. There are a lot of factors that concerned me, especially with the experimental design and the fact that no additional controls were assessed throughout. I also did not see data regarding the partial HI to confirm that it was indeed partial. I highly recommend a biostatistician review all this information. In addition, because you are comparing a new model to an already existing one, you will need to discuss this in significantly more detail. I believe that if you can take care of all the comments, then the paper will be sufficiently improved to send out for review.

Additional Comments:

To echo Dr Prager's comments, I am not fully convinced by the rationale and value for developing a partial + full model vs or in addition to a partial only, as the authors state "Uteroplacental insufficiency states also may take time to develop. " hence, a partial model would be valuable to investigate a milder insult that may trigger similar outcomes in the offspring, Since a partial ischemia can eventually trigger and result in a total uteroplacental insufficiency.

Since this is a new model, a more extensive description and study of the effects on brain structures should be provided, the manuscript completely lacks of any histomorphological characterization. A correlation between the neurobehavioral deficits and brain regions abnormalities should be added, the data in figure 7 are not sufficient.

Furthermore, since these kits were delivered by c-section, could the authors determine if they presented with any neurobehavioural deficit, so that the loss in cell viability can be correlated with normal, mild or severe deficits?

Brain weights should be supplied as well as kits' weights at various ages, especially at birth and then when the neurobehavioural deficits become evident. The only data available are on acute brain cell viability after the H-I insult, figure 7.

The methods needs extensive re-writing as they are not clear and there are missing details. How many kits did on average each dam carried/give birth to?

Gender and Sex are not synonym, but have a very different meaning. Sex should be used as the authors are describing biological differences. The lack of sex differences is surprising, as I would have expected that females might be more protected. The tables should include data for the females as well.

### Authors' Response

---

Comments to the Author:

This study develops a new rabbit model mimicking the partial-to-total placental insufficiency and compared

it with previous models of total uterine ischemia. The introduction has a very important statement describing

the development of a model of CP after HI at preterm gestation but note that they were not sure it mimicked

the actual clinical course, specifically as it relates to an immediate and complete cessation of blood supply

to the uterus. Therefore, developing a new model that is more translational, in that there is a gradual

increase in ischemia is needed. Critically, they note that the new model was compared to the entire dataset

of experiments done since 2004/2005 when the model was first characterized. While the potential to publish

this paper is there, there are a lot of critical errors throughout the manuscript that must be addressed prior

to review. My comments are below and did not include the additional comments from the EiC:

1) In general, what are the randomization and blinding procedures?

The study represents accumulated data from the beginning of the experiments in order to get enough

numbers to reach statistical power. Full H-I numbers have been supplemented from historical data. When

the Partial+Full H-I was started, we compared it to block randomized Full H-I done at the same time in a

ratio of 1:2. But, for the overall study, there is no true randomization because of the addition of historical

controls for Full H-I. We have now included a figure showing how many dams (litters) are divided between the Same Time Period and Historical Data.

2) What is the rationale for developing a partial abruption vs. total? This is necessary in the abstract, which

should also be reduced in size and only the most critical information presented

All available models of H-I in animals that use a single insult consist of a sudden onset of 100% anoxia to

the fetal brain. In real life, these cases are rare and even rarer with placental abruption, which is the clinical

entity that our model mimics. All cases of total placental abruption start off with partial abruption and change

over time to total abruption. Thus, the rationale for developing a new model was to study the transition from

partial to total abruption. The abstract has been revised and reduced.

3) Why in rabbits? Is this a normal model?

**Translational rationale for our rabbit models – motor development:**

Rabbits are **perinatal** motor developers akin to humans (Harel et al., 1978). Naïve rodent motor development starts only in the **postnatal** period. In rodents, there is a lack of a behavioral phenotype

resembling CP in diverse injury models (H-I, inflammation, trauma, chemical, radiation injury).

Pig and nonhuman

primates are also inappropriate for the study of perinatal origins of cerebral palsy (CP) because their

motor development is **prenatal** and is almost complete at birth, unlike humans. The timeline of brain growth

illustrates the difference between mammals that are prenatal, postnatal, and perinatal (Fig 1R).

Development of the oligodendrocyte progenitor cells (PreOLs) also illustrates the perinatal similarity of the

rabbit to humans (Fig 2R).

**Translational rationale – modeling placental abruption:**

The uterine ischemia model results in global fetal hypoxia similar to acute placental insufficiency states in

humans, e.g., akin to that found in placental abruption (**Derrick, Drobyshevsky, Ji, & Tan, 2007; Derrick**

**et al., 2004; Tan et al., 2005; Tan et al., 1998, 1999**). Placental abruption results in a higher incidence of

death and adverse neurobehavioral outcomes in humans (Ananth, Berkowitz, Savitz, & Lapinski, 1999;

Gilbert, Jacoby, Xing, Danielsen, & Smith, 2010; Kayani, Walkinshaw, & Preston, 2003; Logitharajah,

Rutherford, & Cowan, 2009; Matsuda, Maeda, & Kouno, 2003). Uterine ischemia results in global hypoxia to

the fetus. Almost immediately, a combined hypoxia and ischemic insult occurs in the fetal brain (**Derrick et**

**al., 2004**). Hypertonia was observed in ~80% of the newborn survivors after 40 min H-I at E22 and was later

shown to be associated with white matter injury (**Drobyshevsky, Derrick, Wyrwicz, et al., 2007;**

**Drobyshevsky, Jiang, Derrick, Luo, & Tan, 2014; Drobyshevsky, Jiang, Lin, et al., 2014).**

There are

many advantages of our rabbit model over rodents; see Table 1R.

**Fig 1R. Prenatal** brain growth in pig and monkey, **Postnatal** in rat and **Perinatal** in rabbit and human.

**Fig 2R. Oligodendrocyte progenitor cell.**

Rabbits are much closer to humans.

**DAMS NOT AFFECTED:** The uterine ischemia is performed under spinal/epidural anesthesia, and dams

breathe normally and maintain normal blood pressure and blood gases throughout the procedure.

4) While Kendall et al., 2019 provide important information about the 3Rs and reducing animal numbers, I

am concerned about the conditions in which the study took place. Were the housing/husbandry conditions

the same, how did they combine datasets from previous studies? What were the procedures for that and

what were the inclusion/exclusion criteria? What studies specifically did they use data from?

The data reflects two time epochs. From 2004 to 2016, the rabbit studies were conducted at NorthShore

University HealthSystem, and from 2016 onwards, at Wayne State University. The physical condition for

housing/husbandry were almost identical, based on same IACUC protocol. Laboratory personnel

conducting the experiments have been unchanged since 2013. We retrieved all available neurobehavioral

data in surgical groups, sham groups, and naïve group. No data was excluded.

Some of the FHI group of newborn kits (as controls to the PHI+FHI model in the present study) have been

reported for MRI diagnosis (Drobyshevsky, Derrick, Wyrwicz, et al., 2007; Drobyshevsky, Jiang, Lin, et al.,

2014; Drobyshevsky, Yu, et al., 2012) and treatment of CP, including nNOS inhibitors (Ji et al., 2009; Yu et

al., 2011) and stem cells (Drobyshevsky et al., 2015). Inclusion criteria was simple as we were using the

same model for these studies. Exclusion criteria was if there were no neurobehavioral studies performed at

P1.

5) What were the housing/husbandry procedures for the current animals used in this study?

Timed-pregnant New Zealand White dams are ordered from Charles River. Single housing for pregnant

female rabbits in order to reduce stress during pregnancy, facilitate monitoring, and allow appropriate

nesting behavior. There is a separate room for rabbits. Dams were allowed 5-7 days to acclimate following

arrival animal facility and prior to the initiation of experiments. After corresponding surgical procedures,

dams and kits were euthanized after neurobehavioral tests of the kits.

6) How many litters, from how many females? What were the breeding procedures?

Each dam only gave birth to one litter. The numbers of pregnant dams and newborn kits are mentioned in

the article.

**SIMILARITY TO HUMANS COMPARISON with OTHER MAMMALS**

Oxidant-generating systems, such as xanthine oxidase are normally low in rabbits, similar to humans.

Rodents have very high circulatory levels of xanthine oxidase normally that makes the issue of oxidative stress a big confound in rodent studies.

Global H-I in this animal model, akin to abruption placentae

Unilateral, ischemic models in rodents

True fetal model. Term gestation 31.5 days. E25

corresponds to 26-30 weeks, and E29 to 34-36 weeks

gestation in humans, from MRI imaging and

oligodendrocyte maturation studies

Most often postnatal models used in rodents. Prenatal uterine ischemia for 30 min in rats delays acquisition of passive avoidance and longer escape latency in the Morris water maze test at 28 days of age.

Dam not affected by uterine ischemia. Antenatal hypoxia in rodent model affects dam

Limited motor development at birth. Sheep and baboon almost fully developed at birth.

H-I results in obvious motor deficits (hypertonia and postural deficits).

Even with half of a brain gone, H-I and inflammation in rodents show little hypertonia or postural deficits.

**Table 1R.**

Breeding is done with a specific protocol which started with our first supplier, Myrtle's of Tennessee. Since

2015, we have ordered our pregnant dams from Charles River, with strict instructions to follow the same

breeding procedure as before. Copulation is witnessed and three attempts are made under observation for

30 min at 30 min intervals starting at 9 AM. We specifically order multiparous dams.

7) The experimental groups appear to have only consisted of Full H-I and Partial+Full H-I. Why is there not

a partial H-I only group and a naïve control group? These should be included. Also, why did they choose a

partial+full H-I? Where is the rationale for this? How did they determine the timeframe for balloon inflation?

There are no neurobehavioral deficits with naive, sham controls, or partial H-I for 30 min, or even full H-I for 30 min.

There is a progression from partial to total abruption and we modeled our Partial+Full H-I based on this clinical progression (Fig 3R). The rationale was also provided in the 3rd paragraph of the original manuscript. The timeframe for balloon inflation was determined for Full H-I to give a balance of motor deficits and deaths and normal kits.

8) If you used Full-HI from previous studies, then this study only used the partial-full. This is a critical error since you do not have a new control to compare. While it is fine to use previous datasets, you also need to collect a new set of data to ensure that the outcomes will be the same as previously

found.

Actually, that is not true. When the Partial+Full H-I was started at each institution, we compared it to block randomized Full H-I done at the same time in a ratio of 1:2. These dams have been included but because of the lack of numbers, we had to include historical controls to the Full H-I group.

9) The authors note that with the partial H-I, there was low BP to “about half of that before inflation”. Do the authors have data to demonstrate that it was half and how

consistent were they? Were any animals from this group excluded?

We did catheter insertion through the left femoral artery, and checked the BP at the right hindlimb

throughout the procedure. A baseline BP was obtained before the start of Partial+Full or Full H-I, and the

size of balloon to create Partial H-I was determined by BP after the inflation of balloon. For Full H-I, we

generally used 0.3 ml saline for the inflation of balloon (BP non-detectable from the other hindlimb). For

Partial H-I, we generally used 0.07 ml of saline for inflation, which was slightly adjusted according to the BP

after each inflation. The actual blood pressure measurements are provided in Table 2R below.

There were

no excluded animals.

**Table 2R E22 E25**

**B.p. Before Partial After Partial Before Partial After Partial**

Systolic 90.4±2.9 62.0±8.6 99.8±2.7 75.4±3.0

Diastolic 43.8±1.7 29.0±4.2 52.2±5.5 39.9±3.8

MAP 59.3±1.8 40.0±5.6 68.1±4.3 51.7±3.4

**Fig 3R:** Fetal bradycardia occurs with onset of abruption. Drug to be given after fetal bradycardia both in animals and later in humans.

10) How many animals did you start with and how did you determine the sample size? How many died and

how did that change the power?

There may be a misconception by the editor. We have deaths included in the outcome variable.

We

computed power by running Proc Power (SAS 9.4) using a Wilcoxon-Mann-Whitney Test and estimating

originally for 20% delta change in the percentage of Severe and Death categories. Due to the higher

numbers of rabbits available, we ran power analysis again using 15% delta change in the Severe+Death%.

In Fig 4R is the curve of the Power vs. the Combined number of animals. With the actual number of animals

for both groups, we cross the 0.8 threshold, actually 0.813.

11) What were the “minor revisions” for the neurobehavioral assessments

The changes made to the categories in this paper as different from (Z. Shi et al., 2019) is in Table 3R

below:

**Table 3R Added Revisions Removed**

Normal - -

Mild Minor locomotor deficit is now defined: "2.5-3.0".

Locomotor deficit is defined: "<2.5"

Severe Postural changes removed from definition for simplicity.

Dead - -

12) Don't use the word gender, use sex, but how many of each sex were used?

We have now changed gender to sex. The number in each sex category was given in box inserts in Fig 2.

13) How did authors determine the brain regions to assess?

**Fig 4R:** Power vs total no. of animals.

Brain regions represent the regions that control movement. These four regions have been investigated

before our previous studies.

14) Student's T-tests are likely incorrect since the sample sizes are so different. This will be a violation of

the assumption of normality. I recommend that all data are assessed by a biostatistician, especially to

compare the differences in power. Along those lines, the authors need to assess for differences between

the groups of data collected from different studies.

We had run Proc Univariate (SAS 9.4) (which gives us mean, median, S.D., SEM, kurtosis, skewness etc.)

on each neurobehavior test data, and even plotted the Q-Q plots to check for normality of distribution. As

can be seen in Fig 5R, most Q-Q plots satisfy normality of distribution. Given the power of parametric

testing and ease of subsequent power calculation, we elected to use Student's t-test, even though sample

sizes are different. We had elected to show all power calculations to let the reader decide for themselves

whether there was Type I or II error. We have added a sentence to the Statistics section.

15) Correlational analyses were not described in the statistical approaches section

We have added the correlational analysis.

16) Fig 1 appears as a longitudinal design, when it in fact is not. This figure needs to be redone. Again

discuss with a biostatistician, but given that this is a 3x2 between subject design, the figures and data will

need to be revised accordingly.

We are surprised at this comment. The primary outcome variable is a type of ordinal ranked data. The order

matters in this case and is based on how clinicians look at long-term outcome of newborn infants. It would

be incomplete to look at individual outcomes. It is important to note that if deaths are decreased by say

10%, survivors are increased by 10%. A favorable outcome would be if the 10% was distributed between

Normal, Mild and Severe survivors. We have added a reference (Khamis, 2008) to the phrase of "analyzed

by Kendall tau b rank correlation coefficient".

17) Fig 2 doesn't have error bars. Also, do not use bar graphs. Please also check the organization of the



graphs. They do not appear to align with the figure legends.

We would beg to disagree. Again, the data is presented as ordinal ranked data, now with two bars indicating

male and female for comparison. There are no "error" bars for this data because these data are percentages of the total number of kits in each group. We have checked the Legend and are perplexed at

the comment that it is not aligned.

Overall, I cannot allow this paper to go for review yet. There are a lot of factors that concerned me,

especially with the experimental design and the fact that no additional controls were assessed throughout.

**Fig 5R:** Normal distribution checked by Q-Q plots shown for E22.

The controls that the editor is asking for includes naive, sham controls, or partial H-I for 30 min, or even full

H-I for 30 min. We have tested all these groups. All these groups do not manifest neurobehavioral deficits.

I also did not see data regarding the partial HI to confirm that it was indeed partial.

Blood pressure numbers are presented above, show a drop in perfusion. All cases present with fetal

bradycardia just after onset of Partial H-I, which would only happen if the fetus experienced some global

hypoxia from the partial uterine ischemia.

I highly recommend a biostatistician review all this information. In addition, because you are comparing a

new model to an already existing one, you will need to discuss this in significantly more detail.

We have added some sentences to describe the comparison and the historical controls. For our first

publications, we had consulted a biostatistician.

I believe that if you can take care of all the comments, then the paper will be sufficiently improved to send

out for review.

Additional Comments:

**To echo Dr Prager's comments, I am not fully convinced by the rationale and value for developing a**

**partial + full model vs or in addition to a partial only, as the authors state "Uteroplacental insufficiency states also may take time to develop. " hence, a partial model would be valuable to**

**investigate a milder insult that may trigger similar outcomes in the offspring, Since a partial**

**ischemia can eventually trigger and result in a total uteroplacental insufficiency.**

If one looks at the available models of H-I in animals, the single insult consists of a sudden onset of 100%

anoxia to the fetal brain. In real life, these cases are rare and even rarer with placental abruption, which is

the clinical entity that our model mimics. All cases of total placental abruption start off with partial abruption

(see Fig 3R above). So, the progression of partial to total abruption clinically was what we were translating

in the Partial+Full H-I. Please note that in our hands, Partial H-I alone for 30 min or even Full H-I alone for

30 min do not produce any neurobehavioral deficits.

**Since this is a new model, a more extensive description and study of the effects on brain structures should be provided, the manuscript completely lacks of any histomorphological characterization. A correlation between the neurobehavioral deficits and brain regions abnormalities should be added, the data in figure 7 are not sufficient.**

We beg respectfully to disagree for various reasons. 1) Cerebral palsy is a disease entity that involve

survivors. Not much is known of the primary, secondary, tertiary phases of brain cell injury in these patients.

2) The brain histopathology most probably recovers by the time of manifestation of hypertonia and postural

deficits. This thesis is confirmed by numerous neuroimaging studies at older ages. 3) In our animal model, the problem is that histopathological changes are most obvious at the time of secondary and tertiary cell

phases but taking brains 1-3 days after the insult has a) not shown any difference between sham controls

and H-I (blinded analysis showed no difference), and b) we are unable to differentiate between fetuses that

will ultimately become hypertonic (or Severe or Mild) from those fetuses that become normal-looking kits. 4)

Since there were no distinguishing histological lesions between Full H-I and sham controls, we did not

attempt to look at differences between Full and Partial+Full H-I.

Furthermore, since these kits were delivered by c-section, could the authors determine if they presented

with any neurobehavioural deficit, so that the loss in cell viability can be correlated with normal, mild or

severe deficits?

The editor is absolutely right. We cannot distinguish between fetuses that would ultimately become normal,

mild, severe or dead postnatally. This is the most vexing problem studying cerebral palsy. See the response

above. We have developed a fetal MRI biomarker that reliably predicts postnatal hypertonia (Drobyshevsky,

Derrick, Prasad, et al., 2007; Drobyshevsky, Luo, et al., 2012), but only for the E25 fetus and for Full H-I.

Studies are ongoing to extend this MRI biomarker to the Partial+Full H-I and then to investigate cell death

and histopathological changes. These studies are somewhat expensive and are outside the scope of this

paper.

Brain weights should be supplied as well as kits' weights at various ages, especially at birth and then when

the neurobehavioural deficits become evident. The only data available are on acute brain cell viability after

the H-I insult, figure 7.

We did not measure brain or head weights. We have not found brain weights to be of much use

distinguishing between Full H-I and sham controls, even if we do wet/dry weight. Please see the comments

about recovery above. We have kits' body weight in the original Excel sheets next to sex.

The methods needs extensive re-writing as they are not clear and there are missing details.

How many kits did on average each dam carried/give birth to?

We have added an additional reference that provides a detailed description of the animal model (Shi, Luo, &

Tan, 2019) and added some sentences. The averages are mentioned now in Results (it could have been

calculated from the dams and kits' numbers provided in the first paragraph in Results before).

Gender and Sex are not synonym, but have a very different meaning. Sex should be used as the authors

are describing biological differences. The lack of sex differences is surprising, as I would have expected that

females might be more protected.

The tables should include data for the females as well.

We agree and have corrected to sex. We do not find any differences between sex in our animal model. We

had mentioned previously: "We had previously thought that female sex had more deaths but less severely

affected kits in the survivors. With accumulation of enough numbers, we show no statistical difference in

outcomes among males and females. " Even in humans, a severe H-I insult seems to cause the same

amount of injury even if the baby is female.

We have included the male percentage in Tables 1 and 2. We elected not to provide the sex breakdown in

Tables 3 and 4 for two variable correlations.

#### References

Ananth, C. V., Berkowitz, G. S., Savitz, D. A., & Lapinski, R. H. (1999). Placental abruption and adverse

perinatal outcomes. *JAMA*, 282(17), 1646-1651.

Derrick, M., Drobyshevsky, A., Ji, X., & Tan, S. (2007). A model of cerebral palsy from fetal hypoxiaischemia.

*Stroke*, 38(2 Suppl), 731-735. doi:10.1161/01.STR.0000251445.94697.64

Derrick, M., Luo, N. L., Bregman, J. C., Jilling, T., Ji, X., Fisher, K., . . . Tan, S. (2004). Preterm fetal

hypoxia-ischemia causes hypertonia and motor deficits in the neonatal rabbit: a model for human

cerebral palsy? *J Neurosci*, 24(1), 24-34. doi:10.1523/JNEUROSCI.2816-03.2004

Drobyshevsky, A., Cotten, C. M., Shi, Z., Luo, K., Jiang, R., Derrick, M., . . . Tan, S. (2015). Human

Umbilical Cord Blood Cells Ameliorate Motor Deficits in Rabbits in a Cerebral Palsy Model. *Dev Neurosci*, 37(4-5), 349-362. doi:10.1159/000374107

Drobyshevsky, A., Derrick, M., Prasad, P. V., Ji, X., Englof, I., & Tan, S. (2007). Fetal brain magnetic

resonance imaging response acutely to hypoxia-ischemia predicts postnatal outcome. *Ann Neurol*,

61(4), 307-314. doi:10.1002/ana.21095

- Drobyshevsky, A., Derrick, M., Wyrwicz, A. M., Ji, X., Englof, I., Ullman, L. M., . . . Tan, S. (2007). White matter injury correlates with hypertonia in an animal model of cerebral palsy. *J Cereb Blood Flow Metab*, 27(2), 270-281. doi:10.1038/sj.jcbfm.9600333
- Drobyshevsky, A., Jiang, R., Derrick, M., Luo, K., & Tan, S. (2014). Functional correlates of central white matter maturation in perinatal period in rabbits. *Exp Neurol*, 261, 76-86. doi:10.1016/j.expneurol.2014.06.021
- Drobyshevsky, A., Jiang, R., Lin, L., Derrick, M., Luo, K., Back, S. A., & Tan, S. (2014). Unmyelinated axon loss with postnatal hypertonia after fetal hypoxia. *Ann Neurol*, 75(4), 533-541. doi:10.1002/ana.24115
- Drobyshevsky, A., Luo, K., Derrick, M., Yu, L., Du, H., Prasad, P. V., . . . Tan, S. (2012). Motor deficits are triggered by reperfusion-reoxygenation injury as diagnosed by MRI and by a mechanism involving oxidants. *J Neurosci*, 32(16), 5500-5509. doi:10.1523/JNEUROSCI.5986-11.2012
- Drobyshevsky, A., Yu, L., Yang, Y., Khalid, S., Luo, K., Jiang, R., . . . Tan, S. (2012). Antenatal insults modify newborn olfactory function by nitric oxide produced from neuronal nitric oxide synthase. *Exp Neurol*, 237(2), 427-434. doi:10.1016/j.expneurol.2012.07.006
- Gilbert, W. M., Jacoby, B. N., Xing, G., Danielsen, B., & Smith, L. H. (2010). Adverse obstetric events are associated with significant risk of cerebral palsy. *Am J Obstet Gynecol*, 203(4), 328 e321-325. doi:10.1016/j.ajog.2010.05.013
- Harel, S., Shapira, Y., Hartzler, J., Teng, E. L., Quiligan, E., & Van Der Meulen, J. P. (1978). Neuromotor development in relation to birth weight in rabbits. *Biol. Neonate*, 33(1-2), 1-7.
- Ji, H., Tan, S., Igarashi, J., Li, H., Derrick, M., Martasek, P., . . . Silverman, R. B. (2009). Selective neuronal nitric oxide synthase inhibitors and the prevention of cerebral palsy. *Ann Neurol*, 65(2), 209-217. doi:10.1002/ana.21555
- Kayani, S. I., Walkinshaw, S. A., & Preston, C. (2003). Pregnancy outcome in severe placental abruption. *BJOG.*, 110(7), 679-683.
- Khamis, H. (2008). Measures of Association: How to Choose? *J Diagn Med Sonogr*, 24, 155-162. doi:0.1177/8756479308317006
- Logitharajah, P., Rutherford, M. A., & Cowan, F. M. (2009). Hypoxic-ischemic encephalopathy in preterm infants: antecedent factors, brain imaging and outcome. *Pediatr. Res.*
- Matsuda, Y., Maeda, T., & Kouno, S. (2003). Comparison of neonatal outcome including cerebral palsy between abruptio placentae and placenta previa. *Eur. J. Obstet. Gynecol. Reprod. Biol.*, 106(2), 125-129.
- Shi, J., Luo, K., & Tan, S. (2019). Cerebral Palsy Model of Uterine Ischemia in Pregnant Rabbits. In J.

Chen, Z. C. Xu, X. M. Xu, & J. H. Zhang (Eds.), *Animal Models of Acute Neurological Injury* (2nd ed.,

pp. 189-205): Springer International Publishing.

Shi, Z., Vasquez-Vivar, J., Luo, K., Yan, Y., Northington, F., Mehrmohammadi, M., & Tan, S. (2019).

Ascending Lipopolysaccharide-Induced Intrauterine Inflammation in Near-Term Rabbits Leading to

Newborn Neurobehavioral Deficits. *Dev Neurosci*, 1-13. doi:10.1159/000499960

Tan, S., Drobyshevsky, A., Jilling, T., Ji, X., Ullman, L. M., Englof, I., & Derrick, M. (2005).

Model of cerebral

palsy in the perinatal rabbit. *J Child Neurol*, 20(12), 972-979.

Tan, S., Zhou, F., Nielsen, V. G., Wang, Z., Gladson, C. L., & Parks, D. A. (1998). Sustained hypoxia-ischemia

results in reactive nitrogen and oxygen species production and injury in the premature fetal rabbit brain. *J Neuropathol Exp Neurol*, 57(6), 544-553.

Tan, S., Zhou, F., Nielsen, V. G., Wang, Z., Gladson, C. L., & Parks, D. A. (1999). Increased injury following

intermittent fetal hypoxia-reoxygenation is associated with increased free radical production in fetal

rabbit brain. *J Neuropathol Exp Neurol*, 58(9), 972-981.

Yu, L., Derrick, M., Ji, H., Silverman, R. B., Whitsett, J., Vasquez-Vivar, J., & Tan, S. (2011). Neuronal nitric

oxide synthase inhibition prevents cerebral palsy following hypoxia-ischemia in fetal rabbits: comparison between JI-8 and 7-nitroindazole. *Dev Neurosci*, 33(3-4), 312-319.

doi:10.1159/000327244

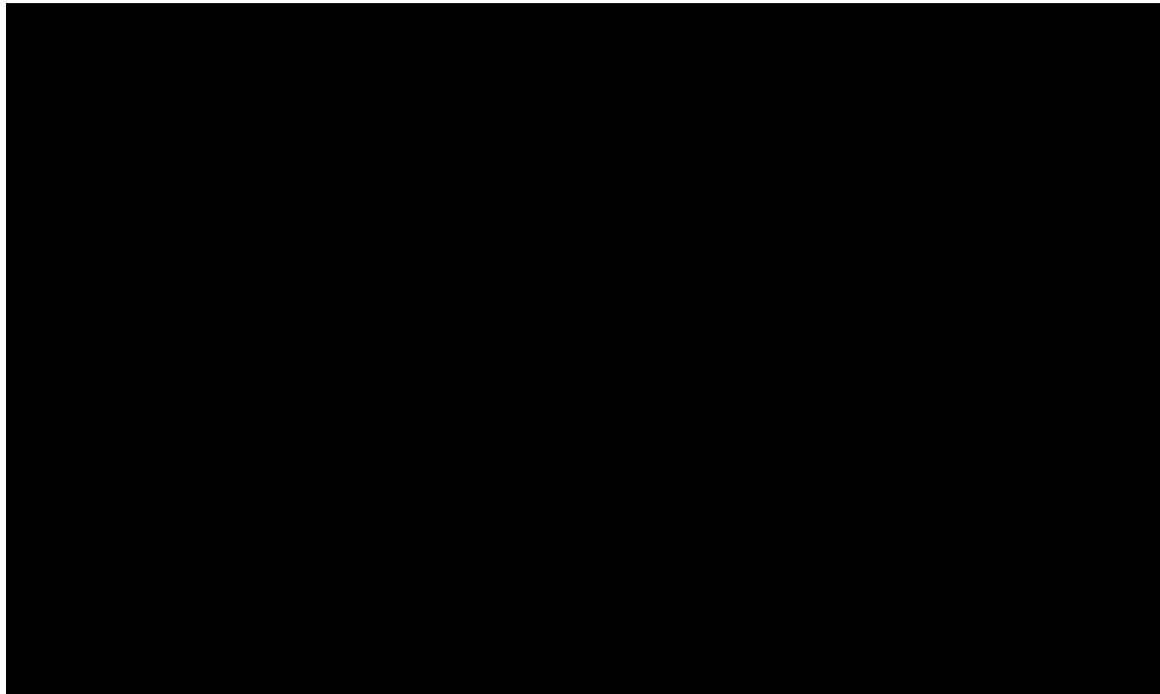

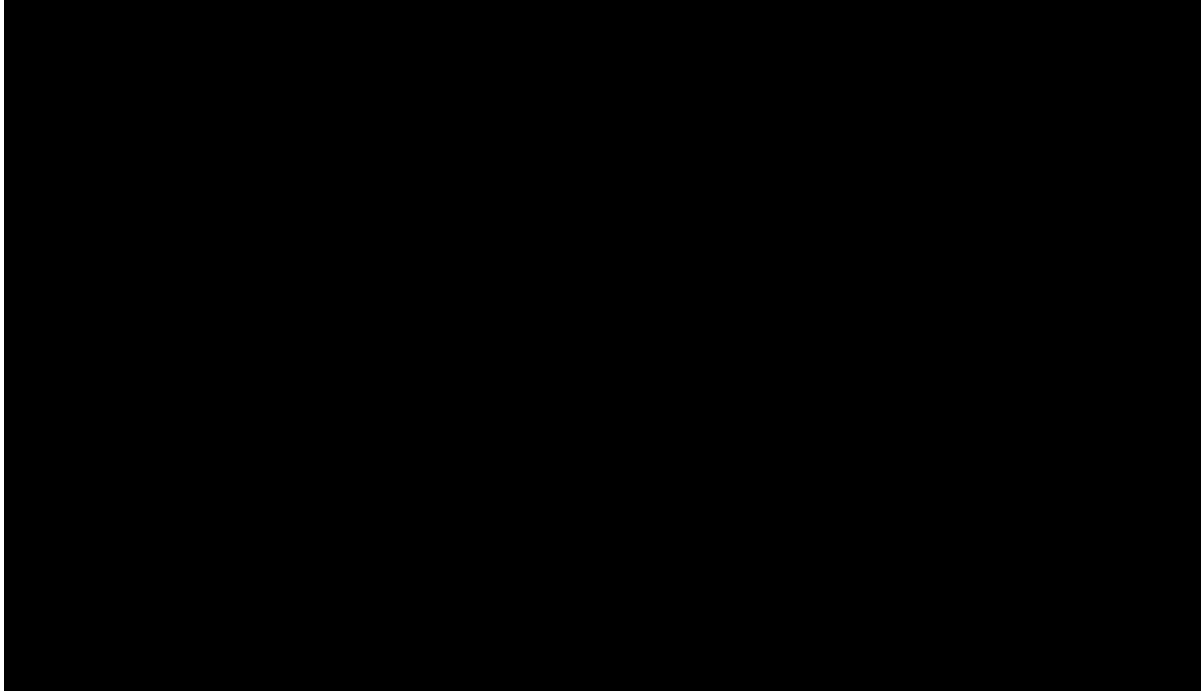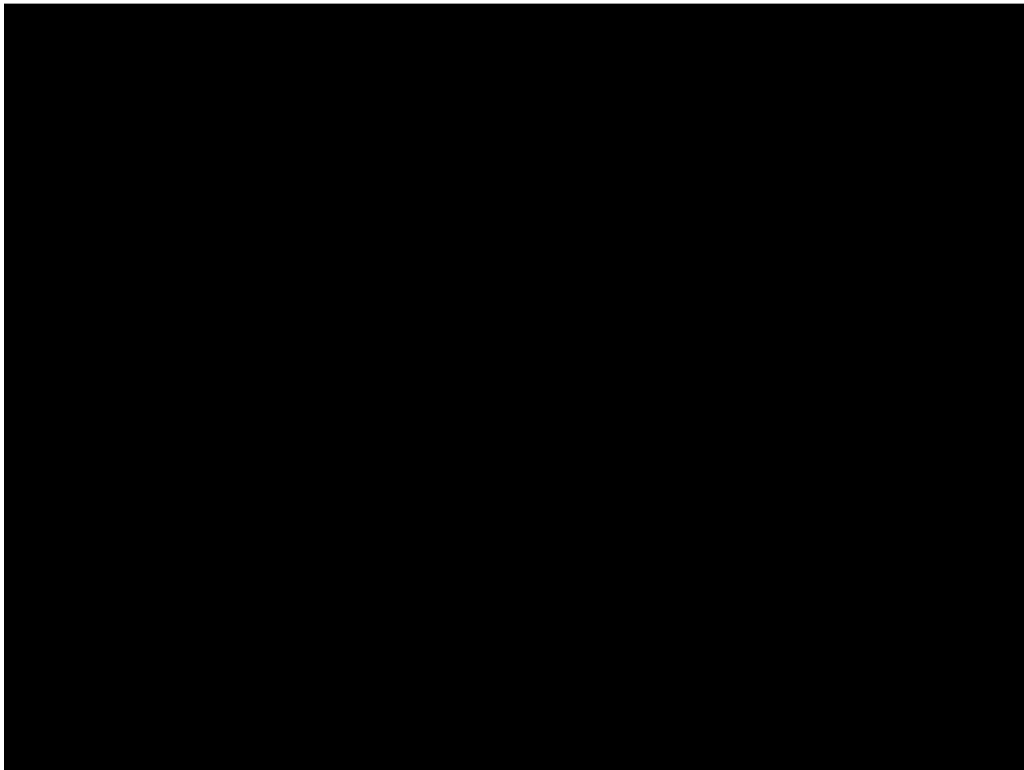

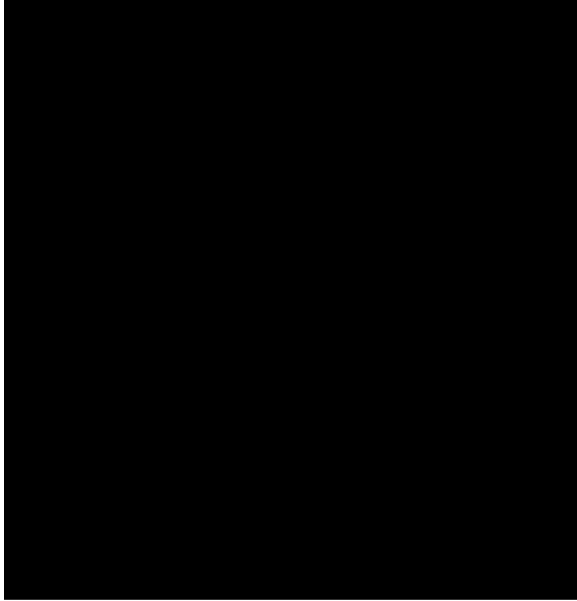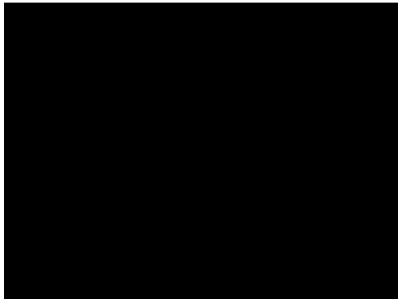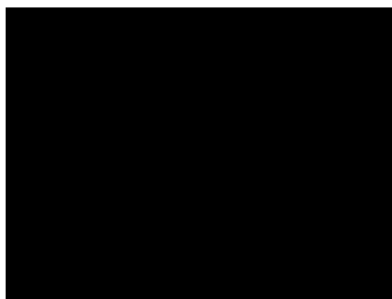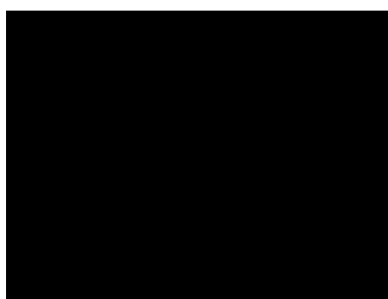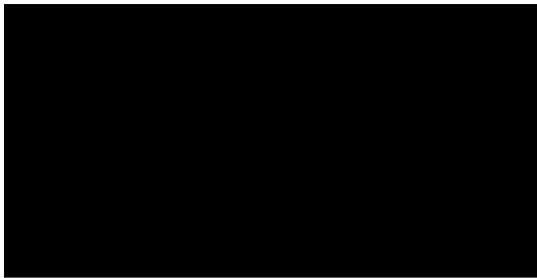

## 2<sup>nd</sup> Editorial Decision

---

### Decision Letter

Dear Dr Shi:

We've now received the feedback from two reviewers and have appended those reviews below along with the editorial comments. The reviewers are overall very enthusiastic and supportive of the study. They did raise some concerns and made some suggestions for clarification, but I expect that these points should be relatively straightforward to address. If there are any questions or points that are problematic, please feel free to contact me. I am glad to discuss.

We ask that the authors carefully revise the manuscript to include all the changes/additions that were requested during the first round of reviews by the editors.

We ask that you return your manuscript within 30 days. Please explain in your cover letter how you have changed the present version and submit a point-by-point response to the editors' and reviewers' comments. If you require longer than 30 days to make the revisions, please contact Dr Cristina Ghiani

(cghiani@mednet.ucla.edu). To submit your revised manuscript: Log in by clicking on the link below  
<https://wiley.atyponrex.com/submissionBoard/1/06f46767-4920-47cc-aeed-10f82581c669/current>

(If the above link space is blank, it is because you submitted your original manuscript through our old submission site. Therefore, to return your revision, please go to our new submission site here ([submission.wiley.com/jnr](https://www.submission.wiley.com/jnr)) and submit your revision as a new manuscript; answer yes to the question "Are you returning a revision for a manuscript originally submitted to our former submission site (ScholarOne Manuscripts)? If you indicate yes, please enter your original manuscript's Manuscript ID number in the space below" and including your original submission's Manuscript ID number (jnr-2021-Jan-9435.R1) where indicated. This will help us to link your revision to your original submission.)

The journal has adopted the "Expects Data" data sharing policy, which states that all original articles and reviews must include a Data Availability Statement (DAS). Please see <https://authorservices.wiley.com/author-resources/Journal-Authors/open-access/data-sharing-citation/data-sharing-policy.html#standardtemplates> for examples of an appropriate DAS. Please include the DAS in the manuscript as well.

Thank you again for your submission to the Journal of Neuroscience Research; we look forward to reading your revised manuscript.

Best Wishes,

Dr Eric Prager  
Associate Editor, Journal of Neuroscience Research

Dr Cristina Ghiani  
Editor-in-Chief, Journal of Neuroscience Research

Associate Editor: Prager, Eric  
Comments to the Author:

We have now received the recommendations from each of the two reviewers and statistical editor. I'm happy to say that they found the manuscript to be well conducted and described, though they each have some minor comments. Importantly, some of the comments described in your response to my original review were not added to the manuscript. Please ensure that if it wasn't added that you do so, when possible. It's important that the conversation be open for all the readers as well. Thank you again and we look forward to receiving your revised manuscript.

Additional Editorial comments:

The introduction would benefit by a bit more background, for instance, the authors may want to expand on the rationale of using rabbits.  
Please make sure to read all the files attached and to format the manuscript following the JNR guidelines to the authors, in particular, the abstract.

#### DATA ACCESSIBILITY

To enable readers to locate archived data from Journal of Neuroscience Research papers, we require authors to include a 'Data Accessibility' section just before the References. This should list the database(s) and URL(s) or dataset DOIs for all data associated with the manuscript. Data deposit repositories might include unstructured repositories such as Dryad, FigShare, NeuroMorpho or centralized repositories from the institutions in which the research was conducted. We also strongly recommend depositing data in the Open Science Framework. JNR will also allow small data sets to be included as Supplementary Files with the article.

The language of the manuscript still need some refinements, some examples from the methods, but there are more throughout :

"Neurobehavior data...." would read better as "Neurobehavioral data...."  
"ordinal data was also" would read better as "ordinal data were also...."

"During the conduct of the newer model, we had conducted a block randomized..." this sentence would read better as ""During the developement of the newer model, we had conducted a block randomized....."

or

"While developing the newer model, we had conducted a block randomized

or

"During the characterisation of the newer model, we had conducted a block randomized..."

"in a ratio of 1:2. For this study, we added historical controls of Full H-I kits to have sufficient power (Fig 1)."

"in a ratio of 1:2. In the present study, we added historical controls of Full H-I kits to have sufficient power



(Fig 1).

Statistics Editor: McArthur, David

Comments to the Author:

Nowhere in the narrative are any actual t-test or anova results presented. For anova we would expect "F(df1,df2) = x.xx, p = 0.yyy" for example, e.g., standard notation. Kindly supply these findings everywhere such test results are appropriate. The statistics cannot be checked without this.

Note please that the "effect of sex" is only appropriate if you are in the business of assigning sex to study participants (which, regrettably, is one possible interpretation for the nonspecialist of your phrase "sex assignments were done"). Instead this is better referred to as "differences by sex" and, for the general readership, "sex assignments" might better be replaced by "assessments of sex".

The exact duplication of values in the upper and lower triangles of the correlation matrices is of no intellectual value. Choose one of the other of the two triangles and leave the opposite side blank.

Minor note: Pink lettering on white background as in Figure 3 is a poor color choice.

Reviewer: 1

Comments to the Author

review is contained in the attachment

Reviewer: 2

Comments to the Author

Summary

This study compares a new rabbit model of fetal hypoxia-ischemia that introduces 30 minutes of partial placental insufficiency followed by 40 minutes of total placental insufficiency. The currently used model induces 40 minutes of total uterine insufficiency, only. The rationale for producing this more gradual model of placental insufficiency is that it is more clinically relevant than the abrupt, full abruption model and that with this new model, neuroprotective drugs can be introduced at the onset of bradycardia, which occurs during the 30 minutes of partial placental insufficiency. This new model is more translational and will be more appropriate for preclinical drug testing than the current model. Overall this is a well written manuscript that clearly presents the results of a significant amount of work. The manuscript has been improved after responding to the Editor's suggested revisions. Below are additional suggestions for revisions and clarifications.

Suggestions for Revisions

1. For Figure 2, it would be helpful to have a legend on the graph to define the colors used for the two groups so that a reader can better comprehend the graph simply by looking at it, and without having to consult the figure legend.
2. For Figure 7. There is a statistically significant difference between the two models for suck/swallow as depicted in 7E as stated in the legend; however there is no indication on the graph that this is statistically different, thus it would be helpful to add an asterisk to demarcate statistical significance.
3. For Figure 8. I cannot determine what the individual lines represent. Does each line represent a biological replicate? Please clarify the figure legend.
4. For Figure 8. Please provide additional information about the assay used in the Methods (incl. catalog number). It is not clear if this is a cell death or a cell viability assay. If the latter, then precaution is urged in interpreting the results as what these data may be showing is reduced cell proliferation in the partial to full H-I group vs. the Full H-I group, which is an entirely different interpretation than concluding that there is ongoing cell death in the partial to full H-I group.
5. The authors introduce the concepts of preconditioning and pre-acclimatization, but then dismiss these as irrelevant for explaining why the partial to full abruption group fared better in terms of fewer male kit deaths and fewer behavioral abnormalities than the full abruption group. However, it seems entirely reasonable to suppose that a physiological adaptation to the H-I is triggered by the partial reduction in blood flow that then reduces the extent of damage when the full H-I condition occurs. While such a scenario is not supported by rat and mouse H-I pre-conditioning models, there are sufficient physiological variables between the rat and mouse models and this new rabbit model such that dismissing such adaptations may be premature. If the authors agree, they should consider discussing this possibility in the Discussion.
6. In this reviewer's opinion the last sentence of the manuscript does not belong in the conclusions. The last paragraph can be re-written to echo the ideas presented in the Statement of Significance.
7. Table 1. The first row heading should be number of dams.
8. Tables 3 and 4. The legends state that  $\alpha < 0.005$ . Is this correct or should it read  $\alpha < 0.05$ ?

## Authors' Response

---

Associate Editor: Prager, Eric

Comments to the Author:

We have now received the recommendations from each of the two reviewers and statistical editor. I'm happy to say that they found the manuscript to be well conducted and described, though they each have some minor comments. Importantly, some of the comments described in your response to my original review were not added to the manuscript. Please ensure that if it wasn't added that you do so, when possible. It's important that the conversation be open for all the readers as well. Thank you again and we look forward to receiving your revised manuscript.

**We thank the editor and reviewers' insightful comments. We have added most of the salient points in our response to the original review now in the manuscript.**

Additional Editorial comments:

The introduction would benefit by a bit more background, for instance, the authors may want to expand on the rationale of using rabbits.

**Added.**

Please make sure to read all the files attached and to format the manuscript following the JNR guidelines to the authors, in particular, the abstract.

**We have revised accordingly.**

DATA ACCESSIBILITY

To enable readers to locate archived data from Journal of Neuroscience Research papers, we require authors to include a 'Data Accessibility' section just before the References. This should list the database(s) and URL(s) or dataset DOIs for all data associated with the manuscript. Data deposit repositories might include unstructured repositories such as Dryad, FigShare, NeuroMorpho or centralized repositories from the institutions in which the research was conducted. We also strongly recommend depositing data in the Open Science Framework. JNR will also allow small data sets to be included as Supplementary Files with the article.

**Data will be available from the corresponding upon reasonable contact.**

The language of the manuscript still need some refinements, some examples from the methods, but there are more throughout :

"Neurobehavior data..." would read better as "Neurobehavioral data..."

"ordinal data was also" would read better as "ordinal data were also..."

"During the conduct of the newer model, we had conducted a block randomized..." this sentence would read better as ""During the developement of the newer model, we had conducted a block randomized....."

or

"While developing the newer model, we had conducted a block randomized

or

"During the characterisation of the newer model, we had conducted a block randomized..."

"in a ratio of 1:2. For this study, we added historical controls of Full H-I kits to have sufficient power (Fig 1)."

"in a ratio of 1:2. In the present study, we added historical controls of Full H-I kits to have sufficient power (Fig 1).

**We have revised accordingly.**

Statistics Editor: McArthur, David

Comments to the Author:

Nowhere in the narrative are any actual t-test or anova results presented. For anova we would expect "F(df1,df2) = x.xx, p = 0.yyy" for example, e.g., standard notation. Kindly supply these findings

everywhere such test results are appropriate. The statistics cannot be checked without this.

**We have entered the information. We have chosen not to depict the actual P values that are not significant, for brevity.**

Note please that the "effect of sex" is only appropriate if you are in the business of assigning sex to study participants (which, regrettably, is one possible interpretation for the nonspecialist of your phrase "sex assignments were done"). Instead this is better referred to as "differences by sex" and, for the general readership, "sex assignments" might better be replaced by "assessments of sex".

**Revised accordingly.**

The exact duplication of values in the upper and lower triangles of the correlation matrices is of no intellectual value. Choose one of the other of the two triangles and leave the opposite side blank.

**We were following depiction of a colored table done before by others to give the reader a quick feel of the strength of the correlations. Has now been modified following the wishes of the reviewer.**

Minor note: Pink lettering on white background as in Figure 3 is a poor color choice.

**Changed to purple.**

Reviewer: 1

Comments are transferred from PDF to the following:

Summary: This manuscript presents clinically relevant data on the outcomes of prenatal hypoxiaischemia in a rabbit model of cerebral palsy with and without a period of partial ischemia preceding the total ischemia. There is also a very interesting data set contained in this paper on the outcomes of hypoxia ischemia at 70% gestation vs ~80% gestation. Although some portions of this paper are difficult to interpret, the results are relevant and important to the community of researchers investigating the relationship between developmental insults and cerebral palsy.

Minor:

Data in figure 1 would be much more appropriate for a pie chart to show distribution.

**Changed to a pie chart.**

Heart rate: it is mentioned in the paper that fetal heart rate is increased within minutes of onset of partial H-I. Please include the data on heart rate for full vs partial H-I.

**We did not record the extent of deceleration in fetal heart rate (not acceleration) as heart rate was monitored by an acoustic signal coming from ultrasound doppler. We also are not able to measure every fetus's heart rate in a litter. When we originally started our model, we would try sequentially measuring fetal heart rate of every fetus across the uterine wall after a laparotomy, using the handheld doppler instrument. The science of heart rate signal analysis has advanced beyond just reporting a heart rate number. To do justice to heart rate comparisons would require some sort of non-invasive imaging and electrocardiographic measurement at the same time, which is simply not feasible in the present *in vivo* rabbit model.**

Figure 4: it is stated in the methods that the olfaction tests are all based on aversive response, but it could be stated more clearly in the methods and results again what "better" and "worse" means in this context. Is it possible for an animal with severe motor deficits to show a strong aversive response?

**The response to odors is based on an ordinal scoring system from 0-4 at 0.5 increments. In this context, "worse" refers to a low score and "better" refers to a higher score. Interestingly, we have previously observed that even rabbit kits with severe motor deficits sometimes had an aversive response with high score. We have added a sentence to the legend.**

**This paper provides enough numbers to look at the question raised by the reviewer and one can see from Tables 3 and 4 that the response to odor has a weak negative correlation (if any) in the Full H-I group at both ages. Only for Partial+Full H-I at E25 (but not at E22) is the strength of negative correlation >0.7. This interesting observation is worthy of further study and confirms our suspicion that the Partial+Full H-I may result in slightly qualitatively different injury from that following Full H-I.**

Figure 7: please include some indicator in Figure 7 that the results of panel E are significantly different. Results of the neck movement (time of activity) should be shown if they are significant.

**We have added an asterisk in Figure 7. The neck movement (time of activity) results were updated, and the P value (=0.0246) was no longer less than the a priori  $\alpha = 0.0029$ . The results have been corrected as well.**

Clarity of the results of cell survival assay: In the abstract it is stated that “Partial + Full H-I (n=6) showed less cell viability than Full H-I (n=8) after 24-hr ex vivo in the brain regions studied.” Since results were not significantly different until 72 hours, it should be stated that cells showed less viability at 72 hrs or after 60 hrs both in the abstract and in the discussion line 54 p 17. This was expressed more clearly in the statement of significance. Later, in the results section, the numbers are provided for cell viability. Are those cell counts? Please state in the results what these numbers are. For reference, what was cell viability in sham control brain tissue?

**We apologize for the inadvertent error. We now mention 72-hour in the abstract.**

**The numbers are unit of luminescent signal that represents live cells in the well.**

**We did not collect data on E25 sham controls because of cost considerations.**

Discussion: Could the authors describe a bit more how the results here differed from Drobyshevsky et al 2012. Specifically, it appears that death of fetuses / neonates increases when the H-I insult occurs later in gestation. This, along with the need to reduce time of H-I when it is inflicted at E28, would suggest that the severity of an insult is greater later in gestation. Paradoxically, the authors here show a higher percentage of severely injured kits at E22 than E25. Do the authors have any theories on why this would be?

**Probably the reviewer meant E29 instead of E28. We have not done any H-I experiments at E28 that we can recall, only inflammation. Yes, we have published previously that the stillbirths and perinatal deaths increases with increasing gestation given the same amount of uterine ischemia (see Derrick et al 2012, *Pediatr Res*, 72(2), 154-160). There is a simple explanation for more severe kits at E22 than E25. We had alluded to it in the discussion in the trickle-down effect. In the continuum of injury, first there is mild, then severe, then death. It is a well-known clinical fact that when we rescue babies with hypoxic-ischemic encephalopathy, the deaths can decrease resulting in greater numbers of severely affected survivors. That is why most clinical studies use death plus major disability as the clinical endpoint for neurotherapeutic studies. We have added some sentences in the discussion.**

Table 1: The numbers should be labeled more carefully. Perhaps “No. of Dead (%)” otherwise the first number is interpreted as a percent not the total. Please apply this to the rest of the categories as well.

**Adjusted.**

Reviewer: 2

Comments to the Author

Summary

This study compares a new rabbit model of fetal hypoxia-ischemia that introduces 30 minutes of partial placental insufficiency followed by 40 minutes of total placental insufficiency. The currently used model induces 40 minutes of total uterine insufficiency, only. The rationale for producing this more gradual model of placental insufficiency is that it is more clinically relevant than the abrupt, full abruption model and that with this new model, neuroprotective drugs can be introduced at the onset of bradycardia, which occurs during the 30 minutes of partial placental insufficiency. This new model is more translational and will be more appropriate for preclinical drug testing than the current model. Overall this is a well written manuscript that clearly presents the results of a significant amount of work. The manuscript has been improved after responding to the Editor’s suggested revisions. Below are additional suggestions for revisions and clarifications.

Suggestions for Revisions

1. For Figure 2, it would be helpful to have a legend on the graph to define the colors used for the two groups so that a reader can better comprehend the graph simply by looking at it, and without having to consult the figure legend.

**Done.**

2. For Figure 7. There is a statistically significant difference between the two models for suck/swallow as depicted in 7E as stated in the legend; however there is no indication on the graph that this is statistically different, thus it would be helpful to add an asterisk to demarcate statistical significance.

**Done.**

3. For Figure 8. I cannot determine what the individual lines represent. Does each line represent a biological replicate? Please clarify the figure legend.

**Each line represents the line joining the reading from one brain region of one fetus. We have added a sentence: "Lines join points that represent Means of n=8 in Full and n=6 in Partial+Full fetal brains." Also, a color legend has been added to the Figure.**

4. For Figure 8. Please provide additional information about the assay used in the Methods (incl. catalog number). It is not clear if this is a cell death or a cell viability assay. If the latter, then precaution is urged in interpreting the results as what these data may be showing is reduced cell proliferation in the partial to full H-I group vs. the Full H-I group, which is an entirely different interpretation than concluding that there is ongoing cell death in the partial to full H-I group.

**We confirm it is RealTime-Glo MT Cell Viability Assay. The luminescent signal is produced by live cells and is in proportion to the number of live cells. We added this information in the revision.**

5. The authors introduce the concepts of preconditioning and pre-acclimatization, but then dismiss these as irrelevant for explaining why the partial to full abruption group fared better in terms of fewer male kit deaths and fewer behavioral abnormalities than the full abruption group. However, it seems entirely reasonable to suppose that a physiological adaptation to the H-I is triggered by the partial reduction in blood flow that then reduces the extent of damage when the full H-I condition occurs. While such a scenario is not supported by rat and mouse H-I pre-conditioning models, there are sufficient physiological variables between the rat and mouse models and this new rabbit model such that dismissing such adaptations may be premature. If the authors agree, they should consider discussing this possibility in the Discussion.

**Conditions for pre-acclimatization or preconditioning were different from those in our new model. While we would like to agree with the reviewer in that the partial uterine ischemia reduces the damage that a full uterine ischemia would cause (mentioned in the sentence in the discussion: "Nevertheless compensatory mechanisms could be triggered ..."), we have no clear-cut confirmation of this (see Fig 2). At this present time, we are not convinced either way whether Partial+Full is worse or better than Full H-I. A future study could investigate Partial+Normal+Full (fulfilling preconditioning) or a stepwise prolonged Partial+Full (fulfilling pre-acclimatization) to tease out the biological effects from these two conditions.**

6. In this reviewer's opinion the last sentence of the manuscript does not belong in the conclusions. The last paragraph can be re-written to echo the ideas presented in the Statement of Significance.

**We have removed the last sentence. We have added some sentences from the Statement of Significance to the last paragraph as suggested.**

7. Table 1. The first row heading should be number of dams.

**Revised accordingly.**

8. Tables 3 and 4. The legends state that  $\alpha < 0.005$ . Is this correct or should it read  $\alpha < 0.05$ ?

**That is correct,  $\alpha < 0.005$ , because of Bonferroni correction. That is why we are confident of the significance of the correlations.**

3<sup>rd</sup> Editorial Decision

Decision Letter

---

Dear Dr Shi:

Thank you for submitting your manuscript to the Journal of Neuroscience Research. We've now received the reviewer feedback and have appended those reviews below. I'm glad to say that the reviewers are overall very enthusiastic and supportive of the study. They did raise some concerns and made some suggestions for clarification, but I expect that these points should be relatively straightforward to address. If there are any questions or points that are problematic, please feel free to contact me. I am glad to discuss.

We ask that you return your manuscript within 30 days. Please explain in your cover letter how you have changed the present version and submit a point-by-point response to the editors' and reviewers' comments. If you require longer than 30 days to make the revisions, please contact Dr Cristina Ghiani (cghiani@mednet.ucla.edu). To submit your revised manuscript: Log in by clicking on the link below <https://wiley.atyponrex.com/submissionBoard/1/5fdc48f8-f8bb-405a-8648-83315e53f587/current>

(If the above link space is blank, it is because you submitted your original manuscript through our old submission site. Therefore, to return your revision, please go to our new submission site here ([submission.wiley.com/jnr](https://submission.wiley.com/jnr)) and submit your revision as a new manuscript; answer yes to the question "Are you returning a revision for a manuscript originally submitted to our former submission site (ScholarOne Manuscripts)? If you indicate yes, please enter your original manuscript's Manuscript ID number in the space below" and including your original submission's Manuscript ID number (jnr-2021-Jan-9435.R2) where indicated. This will help us to link your revision to your original submission.)

The journal has adopted the "Expects Data" data sharing policy, which states that all original articles and reviews must include a Data Availability Statement (DAS). Please see <https://authorservices.wiley.com/author-resources/Journal-Authors/open-access/data-sharing-citation/data-sharing-policy.html#standardtemplates> for examples of an appropriate DAS. Please include the DAS in the manuscript as well.

Thank you again for your submission to the Journal of Neuroscience Research; we look forward to reading your revised manuscript.

Best Wishes,

Dr Eric Prager  
Associate Editor, Journal of Neuroscience Research

Dr Cristina Ghiani  
Editor-in-Chief, Journal of Neuroscience Research

Associate Editor: Prager, Eric

Comments to the Author:

Thank you for your revisions. The manuscript is nearly ready to be accepted. The first reviewer did make a mistake in requesting the pie chart for Fig 1 and asked that you replace that with the original figure and make fig 2 a pie chart.

My other concern is your statement you wrote in response to the statistical editor that you chose not to depict that P value that are not significant for brevity. That is not an acceptable response, in my opinion and I ask that you please include all exact p values, whether significant or not. We do not have page/word limits so brevity is a non-issue.

After you fix these two small issues, we will be happy to accept the paper without further review.

Additional Editorial comments:

The manuscript will still benefit by a thorough editing of the language.

Please note that 'data' is the plural form, so the verb should always be plural:

"The data was derived ..." should be "The data WERE derived ...."  
"No data was excluded." should be "No data were excluded."

'.....the analysis and interpretation of THE data...'

Reviewer: 2

Comments to the Author  
The authors have satisfied my concerns.

Reviewer: 1

Comments to the Author  
The manuscript is much improved and almost ready for publication. In my previous review I had erroneously stated that Figure 1 would be more appropriate as a pie chart. I intended to write that Figure 2 would be more appropriate as a pie chart. If this change could be made (figure 1 reverted to previous format and convert figure 2 to a pie chart), I have no further comments.

### Authors' Response

---

Associate Editor: Prager, Eric

Comments to the Author:

Thank you for your revisions. The manuscript is nearly ready to be accepted. The first reviewer did make a mistake in requesting the pie chart for Fig 1 and asked that you replace that with the original figure and make fig 2 a pie chart.

The previous version of Fig 1 is used. The new Fig 2 with pie chart is used.

My other concern is your statement you wrote in response to the statistical editor that you chose not to depict that P value that are not significant for brevity. That is not an acceptable response, in my opinion and I ask that you please include all exact p values, whether significant or not. We do not have page/word limits so brevity is a non-issue.

The exact p values are added in figure legends.

After you fix these two small issues, we will be happy to accept the paper without further review.

Additional Editorial comments:

The manuscript will still benefit by a thorough editing of the language.

Please note that 'data' is the plural form, so the verb should always be plural:

"The data was derived ..." should be "The data WERE derived ...."

"No data was excluded." should be "No data were excluded."

'.....the analysis and interpretation of THE data...'

Revised accordingly.

Reviewer: 2

Comments to the Author  
The authors have satisfied my concerns.

Reviewer: 1

Comments to the Author  
The manuscript is much improved and almost ready for publication. In my previous review I had erroneously stated that Figure 1 would be more appropriate as a pie chart. I intended to write that Figure 2 would be more appropriate as a pie chart. If this change could be made (figure 1 reverted to previous format and convert figure 2 to a pie chart), I have no further comments.

Revised as above.

**Decision Letter**

Dear

Dr

Shi:

Thank you for the hard work you put into this paper. It is excellent and we are happy to accept it. Congratulations!

In the coming weeks, the Production Department will contact you regarding a copyright transfer agreement and they will then send an electronic proof file of your article to you for your review and approval.

Please note that your article cannot be published until the publisher has received the appropriate signed license agreement. Within the next few days, the corresponding author will receive an email from Wiley's Author Services asking them to log in. There, they will be presented with the appropriate license for completion. Additional information can be found at <https://authorservices.wiley.com/author-resources/Journal-Authors/licensing-open-access/index.html>

Would you be interested in publishing your proven experimental method as a detailed step-by-step protocol? Current Protocols in Neuroscience welcomes proposals from prospective authors to disseminate their experimental methodology in the rapidly evolving field of neuroscience. Please submit your proposal here: <https://currentprotocols.onlinelibrary.wiley.com/hub/submitproposal>

Congratulations on your results, and thank you for choosing the Journal of Neuroscience Research for publishing your work. I hope you will consider us for the publication of your future manuscripts.

Sincerely,

Dr Associate Editor, Journal of Neuroscience Research Eric Prager

Dr Editor-in-Chief, Journal of Neuroscience Research Cristina Ghiani

**Author response**
